# Supplementary material
Source: publisher figshare collection journal article supplement (https://gsapubs.figshare.com/articles/dataset/_/22595941)
Supplement: Supplementary file 1 [file 1]

## Sheet: Sheet1
	Volume % of phase [%]
	Mineral List / Dataset	ICI 228 208 - Modal analysis #1	ICI 228 208 - Modal analysis #2	ICI 228 208 - Modal analysis #3	ICI 228 208 - Modal analysis #4	ICI 228 208 - Modal analysis #5	ICI 721 173-2 - Modal analysis #1	ICI 721 173-2 - Modal analysis #2	ICI 721 173-2 - Modal analysis #3	ICI 721 173-2 - Modal analysis #4	ICI 228 208-3 - Modal analysis #1	ICI 228 208-3 - Modal analysis #2	ICI 228 208-3 - Modal analysis #3	ICI 228 208-3 - Modal analysis #4	ICI 228 208-3 - Modal analysis #5
	Quartz	58.75	29.24	24.86	18.58	14.5	40.25	4.73	0.8	0.06	69.25	47.86	55.78	11.75	57.04
	Plagioclase	0	0.01	0	0	0	0	0	0	0	1.04	0.33	0.32	0.01	0.03
	Muscovite	6.1	9.76	2.88	0.3	0.14	2.31	0.18	0.25	0.58	9.74	2.89	3.26	0.03	1.08
	Biotite	0.63	1.03	0.6	0.28	0.09	2.12	0.33	0.16	0.01	1.78	0.92	0.99	0.11	0.38
	Chlorite	7.98	9.02	12.41	19.58	7	2.34	1.98	1.74	0	7.88	11.79	6.41	3.63	6.8
	Carbonates	0	0	0	0.03	0	0	0	0	0	0	0.01	0	0.04	0
	Rutile/Ilmenite	0	0	0	0	0	0	0	0	0	0.1	0.06	0.03	0.02	0.03
	Apatite	0.11	0.16	0.1	1.64	0	0.02	0	0	0	0.11	0.13	0.11	0.49	0
	Fe- (Mn-) oxide	2.01	1.18	0.77	1.53	1.73	0.17	0.19	0.16	0.05	2.5	2.3	9.64	25.7	5.58
	Pyrite	17.75	34.62	49.82	44.81	66.16	31.83	56.65	61.48	67.31	1.45	3.77	2.38	32.94	17.94
	Co-bearing Pyrite	2.02	2.98	5.34	1.75	4.11	16.19	27.61	28.22	27.16	0.14	0.31	0.24	2.35	1.15
	Co-Sulfide	0.02	0.03	0.12	0.06	0.74	0.02	0.02	0.02	0.01	0.03	0.1	0.05	1.56	1.96
	Chalcopyrite	3.95	11.04	2.46	10.59	5	4.38	7.74	6.9	4.68	5.15	28.09	19.72	19.95	7.15
	Sphalerite	0.01	0.02	0	0	0	0.03	0.06	0	0	0.01	0.07	0.02	0.03	0.11
	Other minerals	0.03	0.05	0.02	0.04	0.04	0.04	0.09	0.03	0.03	0.03	0.1	0.07	0.21	0.02
	[Unclassified]	0.64	0.86	0.61	0.82	0.49	0.29	0.42	0.25	0.11	0.79	1.27	0.98	1.19	0.72
	Total	100	100	100	100	100	100	100	100	100	100	100	100	100	100

## Sheet: G51160
Holley, E.A., et al., 2023, Cobalt mineralogy at the Iron Creek deposit, Idaho cobalt belt, USA: Implications for domestic critical mineral production: Geology, https://doi.org/10.1130/G51160.1
